# Supplementary material for: SARS-CoV-2 nsp3 and nsp4 are minimal constituents of a pore spanning replication organelle
Source: Springer Nature journal article supplement (doi:10.1038/s41467-023-43666-5), 2023-11-30
Supplement: MOESM1 [file 41467_2023_43666_MOESM1_ESM.pdf]

## Supplementary Information

### **SARS-CoV-2 nsp3 and nsp4 are minimal constituents of a pore spanning replication organelle**

**Authors:** Liv Zimmermann<sup>1</sup>, Xiaohan Zhao<sup>1</sup>, Jana Makroczyova<sup>1</sup>, Moritz Wachsmuth-Melm<sup>1</sup>, Vibhu Prasad<sup>2</sup>, Zach Hensel<sup>3</sup>, Ralf Bartenschlager<sup>2, 4, 5</sup>, Petr Chlanda<sup>1\*</sup>

\*Corresponding author. Email: petr.chlanda@bioquant.uni-heidelberg.de

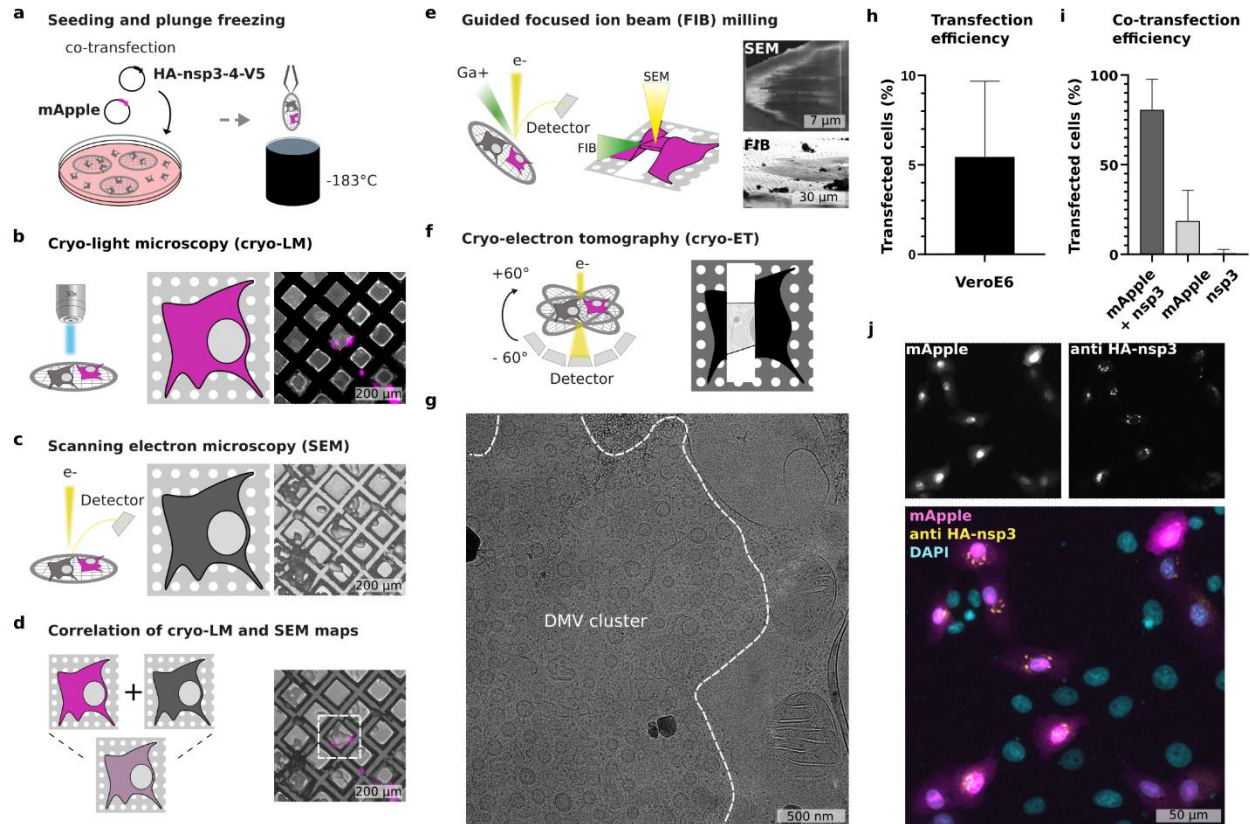

**Supplementary Fig. 1.**

***In situ* cryo-correlative light and electron microscopy workflow for guided cryo-focused FIB milling.**

**a** VeroE6 cells were seeded on gold EM grids and transfected with plasmids encoding for SARS-CoV-2 nsp3-4 proteins and a fluorescent marker (mApple). Cells on grids were plunge frozen in liquid ethane. **b** The grid was mapped in a cryo-LM. **c** Inside a cryo-FIB/SEM microscope, a high resolution SEM image was acquired. **d** The cryo-LM and SEM maps were correlated to find transfected cells with the fluorescent mApple signal. **e** The mApple positive cells were FIB-milled. **f** The lamella was mapped by cryo-TEM (**g**) and tilt series were acquired on sites of interest. **b-f** Edited from <sup>43</sup>. **g** Map of a lamella containing a DMV cluster (borders of the cluster are indicated with dashed lines). **h** Transfection efficiency 24 hpt in VeroE6 cells (n = 3472 cells). **i** Co-transfection efficiency of the two constructs (n = 186 transfected cells). **h-i** Data are presented as mean with SD. Data from one experiment. **j** Co-transfection of plasmids encoding HA-nsp3-4-V5 and mApple (24 hpt). Nsp3 was detected by indirect immunofluorescence using an anti-HA antibody.

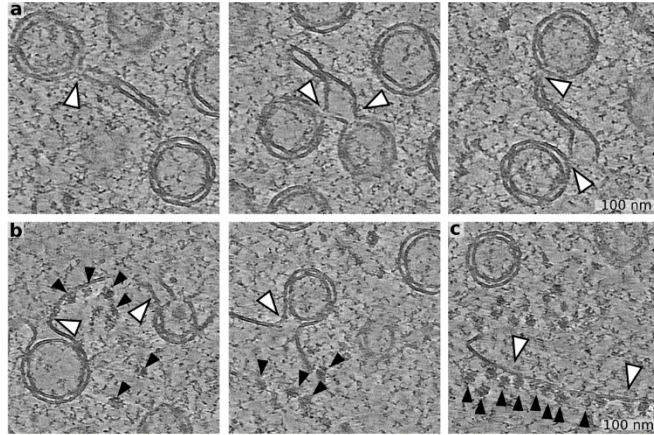

**Supplementary Fig. 2.**

**Gallery of DMCs, DMV-ER connections and ER cisternae with ribosomes in close proximity to DMV network.** **a** Examples of DMCs containing pores interconnecting several DMVs indicated by white arrowheads. **b** DMVs connected to ER indicated by white arrowheads. Ribosomes are indicated by black arrowheads. **c** ER cisternae indicated by white arrowheads and ribosomes indicated by black arrowheads directly next to DMVs.

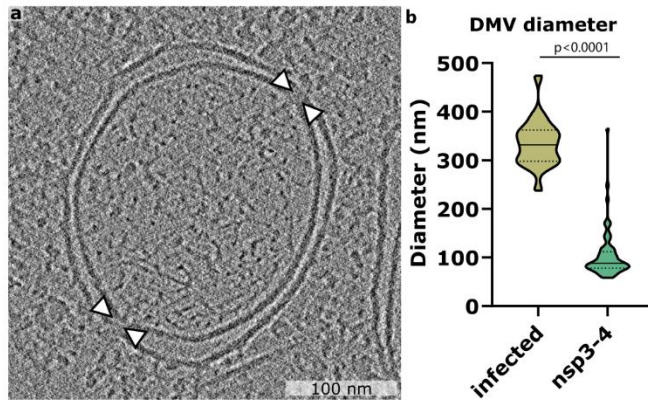

**Supplementary Fig. 3.**

**Comparison of DMV diameter in infected and nsp3-4 transfected cells.** **a** Slice of a tomogram showing a DMV found in SARS-CoV-2 infected and chemically fixed VeroE6 cells (dataset of tomograms from a previous publication<sup>10</sup>). Pores are highlighted by white arrowheads. **b** Plot showing the longest inner diameter of DMVs in SARS-CoV-2 infected (n = 20, 16 hpi) and in nsp3-4 transfected cells (n = 62, 16 hpt). Data is shown as a Violin plot indicating the median, 25% and 75% quartiles. Unpaired two-tailed t-test showed significant differences.



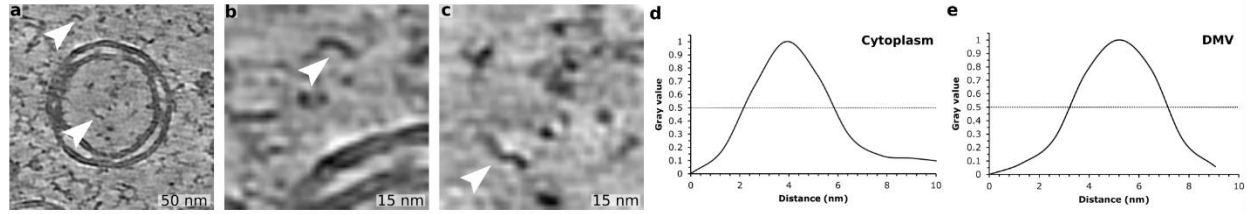

**Supplementary Fig. 4.**

**Measurements of filaments found outside of DMVs and in the DMV lumen in VeroE6 cells.**

**a** DMV found in nsp3-4 transfected cell. Indicated are filamentous structures outside and inside the DMV. **b** Magnified view of **a** shows a filamentous structure outside of DMV. **c** Magnified view of **a** shows a filamentous structure inside DMV. **d** Line density profile of filament outside of DMV was generated in ImageJ/FIJI and shows a diameter of 3.65 nm. **e** Line density profile of filament in the DMV lumen shows a diameter of 3.94 nm.

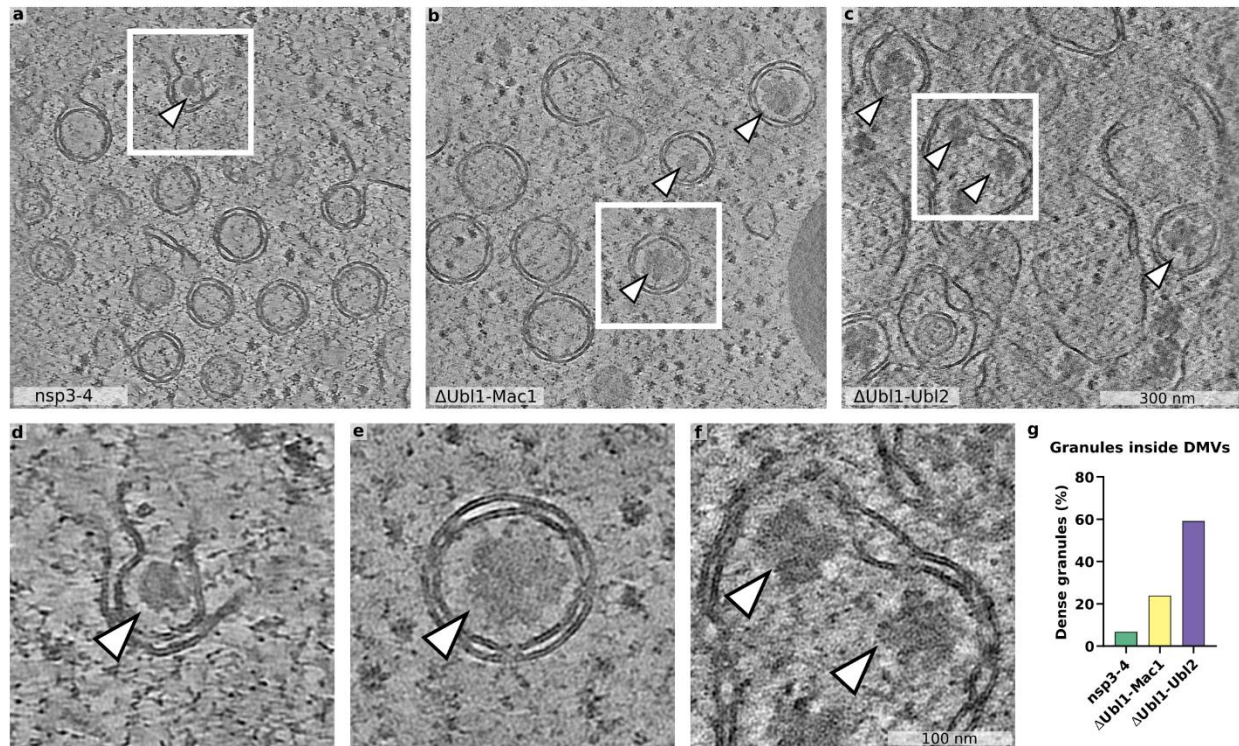

**Supplementary Fig. 5.**

**Granular density of unknown origin localized inside DMVs. a-c** Averaged slices of tomograms of VeroE6 cells transfected with nsp3-4 (**a**),  $\Delta$ Ubl1-Mac1 (**b**) and  $\Delta$ Ubl1-Ubl2 (**c**) and processed at 18-24 hpt. **d-f** Averaged slices of tomograms showing the magnified views highlighted by a white rectangle in (**a-c**). Granular densities of unknown origin are indicated by white arrowheads. **g** Distribution of DMVs filled with granular densities compared to the total amount of DMVs in nsp3-4,  $\Delta$ Ubl1-Mac1 and  $\Delta$ Ubl1-Ubl2 samples.

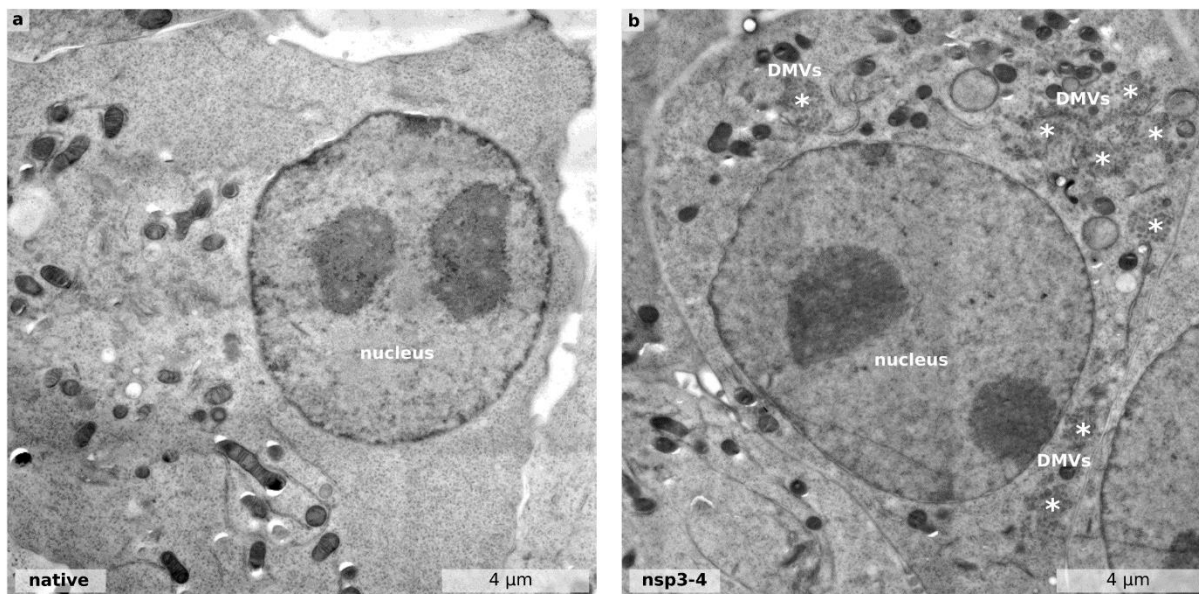

**Supplementary Fig. 6.**

**DMV clusters distribute in cytoplasm.** **a** Thin-section EM images of native HEK293T cells. **b** HEK293T cells transfected with HA-nsp3-4-V5. DMV clusters vary in size and measure up to several microns. DMV clusters are indicated with white asterisks.

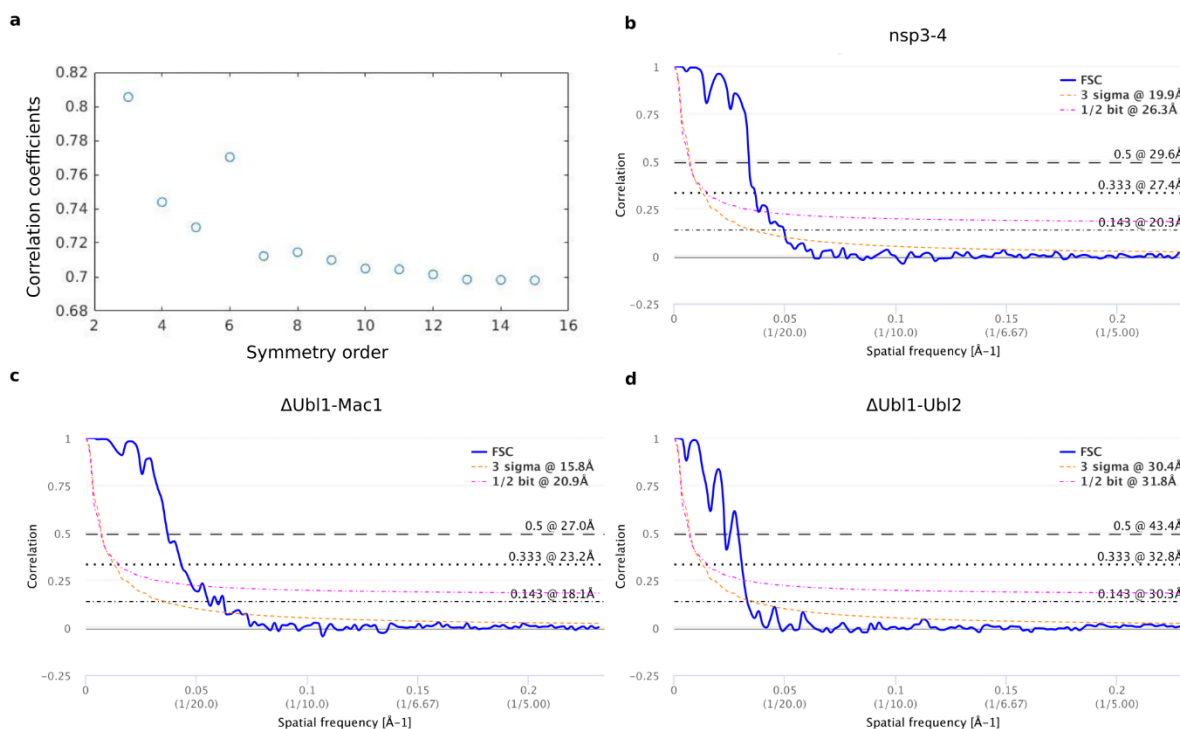

**Supplementary Fig. 7.**

**Fourier shell correlation curves from subtomogram averages upon implying sixfold symmetry. a** Correlation coefficients between unsymmetrized and symmetrized averages. **b** Fourier shell correlation curve from nsp3-4 pores showing a resolution of around 20.3Å at 0.143 criterion. **c** Fourier shell correlation curve from  $\Delta$ Ubl1-Mac1 pores showing a resolution of around 18.1Å at 0.143 criterion. **d** Fourier shell correlation curve from  $\Delta$ Ubl1-Ubl2 pores showing a resolution of around 30.3Å at 0.143 criterion.

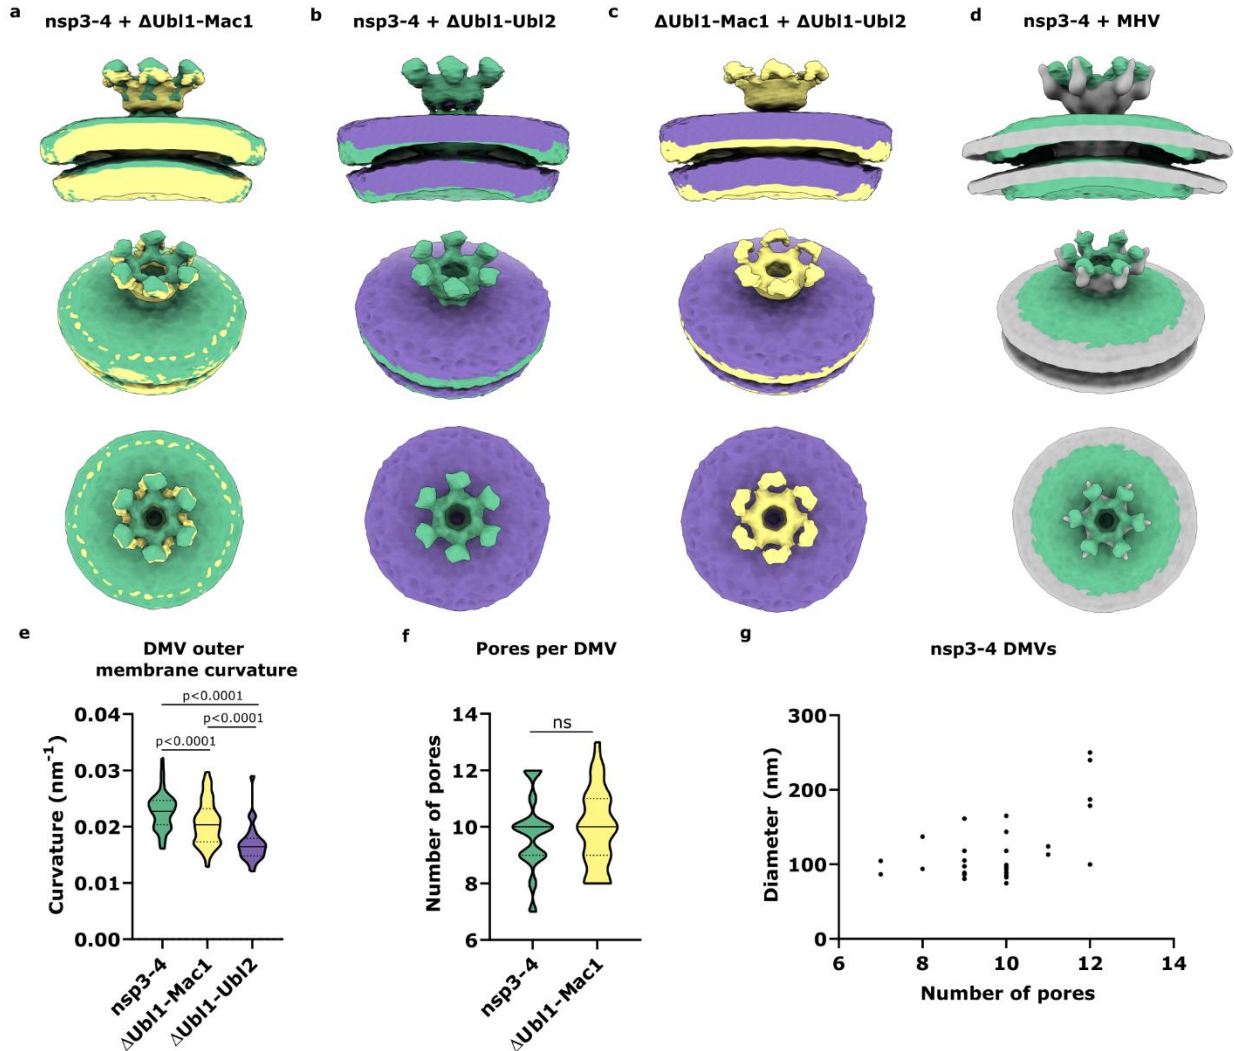

**Supplementary Fig. 8.**

**Comparison of isosurfaces and additional measurements characterizing the DMVs. a** Isosurface of nsp3-4 pore compared to the isosurface of  $\Delta$ Ubl1-Mac1 pore showing partially collapsed prongs in  $\Delta$ Ubl1-Mac1 pore and differences in membrane curvature. **b** Isosurface of nsp3-4 pore compared to the isosurface of  $\Delta$ Ubl1-Ubl2 pore showing the loss of the prongs in  $\Delta$ Ubl1-Ubl2 pore and differences in membrane curvature. **c** Isosurface of  $\Delta$ Ubl1-Mac1 pore compared to the isosurface of  $\Delta$ Ubl1-Ubl2 pore showing the



loss of the prongs in  $\Delta$ Ubl1-Ubl2 pore and differences in membrane curvature. **d** Isosurface of nsp3-4 pore (surface level 0.375) compared to the isosurface of DMV pore of MHV infected cells (surface level 2.19) showing differences in prongs of pores and differences in membrane curvature. **e** The outer membrane curvature of DMV was determined using the osculating circle method (nsp3-4:  $n = 103$ ;  $\Delta$ Ubl1-Mac1:  $n = 103$ ;  $\Delta$ Ubl1-Ubl2:  $n = 26$ ) **f** Number of pores per DMV in nsp3-4 ( $n = 31$ ),  $\Delta$ Ubl1-Mac1 ( $n = 31$ ). Data is shown as a Violin plot indicating the median, 25% and 75% quartiles. Unpaired two-tailed t-test showed significant differences. **g** Inner DMV diameter and number of pores per DMV do not correlate ( $R^2=0.2915$ ).

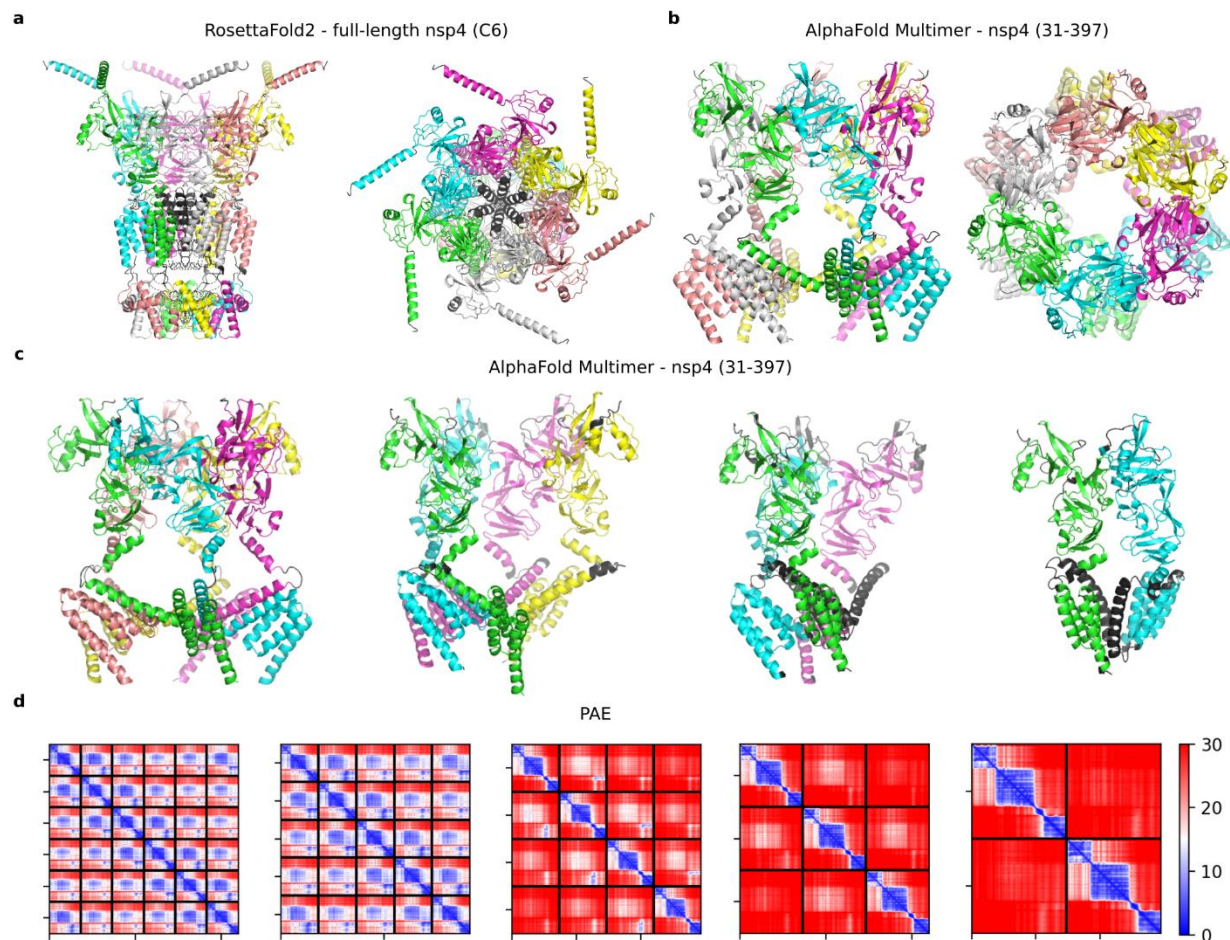

**Supplementary Fig. 9.**

**Prediction of nsp4 with RosettaFold2 and AlphaFold Multimer.** **a** RosettaFold2 prediction of full-length nsp4 enforcing C6 symmetry. Residues 268-315 linking nsp4 luminal and TM domains lacks a high confidence prediction, as do residues 393-414 linking TM and C-terminal domains. **b** Unconstrained interference of six copies of nsp4 residues 31-397 with AlphaFold Multimer predicts a hexamer. **a-b** Left: side view, right: top view. **c** Structures of best scoring complexes for pentamer, tetramer, trimer and dimer predicted with AlphaFold Multimer. **a-c** Residues are colored by chain except for those with pLDDT < 50

colored in dark gray. **d** Pair alignment error (PAE) of predictions for nsp4 multimers (31-397) shows that interaction between subunits is predicted with higher confidence for hexameric and pentameric complexes. Left-right: PAE for hexamer, pentamer, tetramer, trimer and dimer. Scale bar in Å.

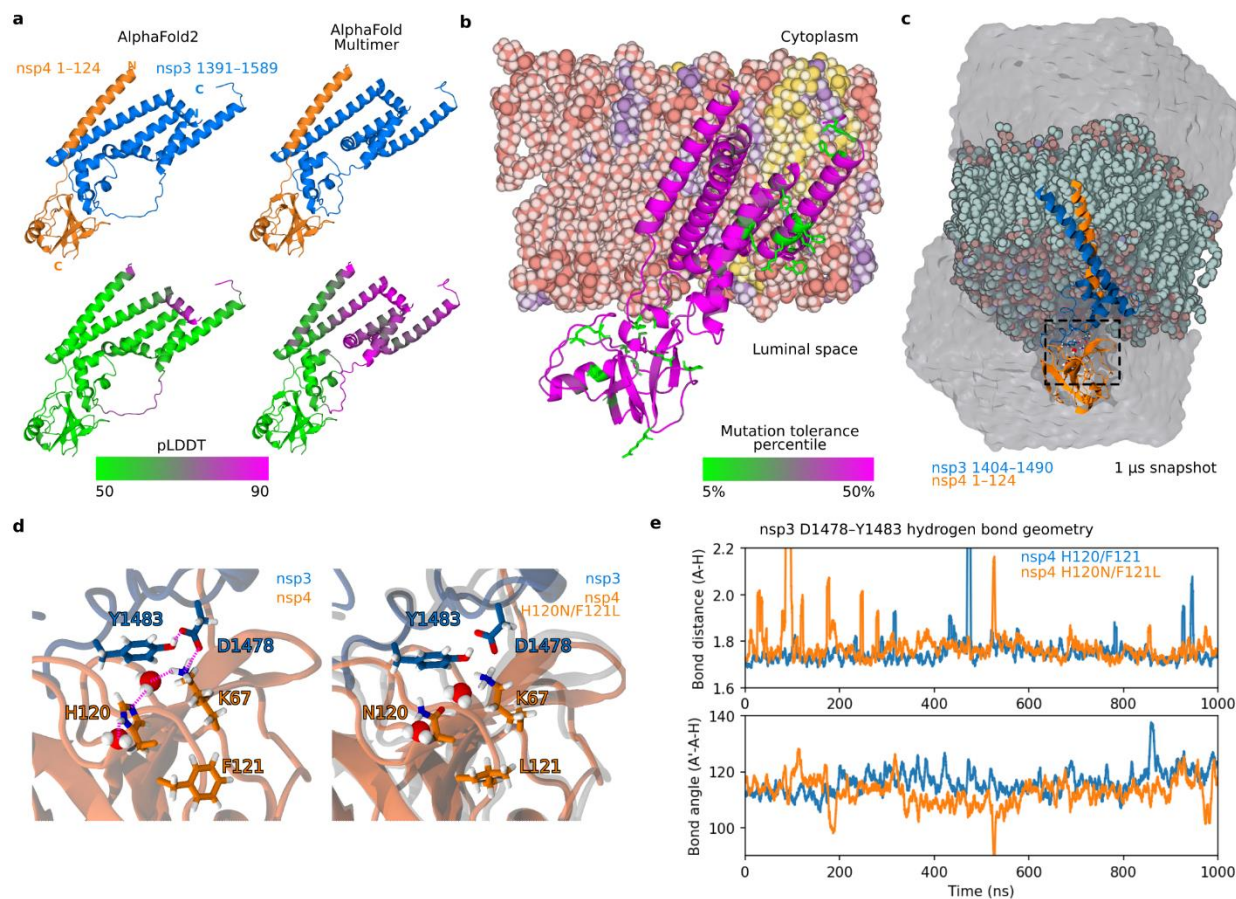

**Supplementary Fig. 10.**

**Prediction, conservation, and dynamics of nsp3-nsp4 complex at the DMV outer membrane. a** Structure predictions by AlphaFold2 and AlphaFold-Multimer and their pLDDT values are shown for all predicted residues nsp3 1391–1589 and nsp4 1–124. **b** The average of the logarithm of the tolerance to mutation for the first two nucleotides in each codon is mapped to the AlphaFold2 structure prediction, scaled from the 5<sup>th</sup> to 50<sup>th</sup> percentile of values for all of ORF1a. Residues in the bottom 10<sup>th</sup> percentile for mutation tolerance are shown as sticks and include an nsp4 disulfide bond, buried hydrophobic residues, the hydrogen bond network at the nsp3-nsp4 interface, and a cluster of nsp3 residues that may contribute to membrane curvature and/or pore oligomerization. Alignment to the lipid bilayer is based on coordinates of nsp4 36–124 after 1 μs molecular dynamics. POPC, DOPE, and SAPI lipids are colored pink, purple and yellow, respectively. Cytoplasmic and luminal faces of the bilayer are based on predicted membrane topology. **c** Tilted view of all-atom molecular dynamics system for simulated chains nsp3 1404-1490 and



nsp4 1-124; although nsp3 and nsp4 are rendered separately, helices are buried in the bilayer. Non-hydrogen bilayer atoms are shown and colored by atom name. **d** The region highlighted in **c** is shown for the 1- $\mu$ s timepoint of nsp4 wild-type and H120N/F121L simulations. Structures are aligned to the Ca positions of labeled residues and labels are positioned identically to facilitate comparison. H120N disrupts the hydrogen bond network at the nsp3-nsp4 interface formed by nsp3 D1478, nsp3 Y1483, and nsp4 K67, with nsp3 Y1483 displaced and less optimal geometry for hydrogen bonds to a water molecule linking nsp4 K67 and nsp4 H120. The wild-type conformation is reproduced in gray on the right to illustrate deformation by the buried, hydrophobic F121L mutation. **e** 5-ns moving averages of hydrogen bonding geometry between nsp3 D1478 and nsp3 Y1483 show instability in the H120N/F121L simulation for the first ~300 ns followed by a decrease of 4.2 ° in the median bond angle in the final 500 ns of simulation.

| Step | T start | T end | Slope    | Time   | Reagent       | Transfer  | Agitation | UV  |
|------|---------|-------|----------|--------|---------------|-----------|-----------|-----|
| 1    | -90°C   | -90°C |          | 48 h   | 0.1% UA       | stay      | off       | off |
| 2    | -90°C   | -45°C | 5 °C/h   | 9 h    | 0.1% UA       | stay      | off       | off |
| 3    | -45°C   | -45°C |          | 5 h    | 0.1% UA       | stay      | off       | off |
| 4    | -45°C   | -45°C |          | 10 min | Acetone       | exch/fill | off       | off |
| 5    | -45°C   | -45°C |          | 10 min | Acetone       | exch/fill | off       | off |
| 6    | -45°C   | -45°C |          | 10 min | Acetone       | exch/fill | off       | off |
| 7    | -45°C   | -45°C |          | 4 h    | 10% Lowicryl  | mix       | on        | off |
| 8    | -45°C   | -45°C |          | 4 h    | 25% Lowicryl  | mix       | on        | off |
| 9    | -45°C   | -35°C | 2.5 °C/h | 4 h    | 50% Lowicryl  | mix       | on        | off |
| 10   | -35°C   | -35°C | 2.5 °C/h | 4 h    | 75% Lowicryl  | mix       | on        | off |
| 11   | -35°C   | -35°C |          | 10 h   | 100% Lowicryl | exch/fill | off       | off |
| 12   | -35°C   | -35°C |          | 10 h   | 100% Lowicryl | exch/fill | off       | off |
| 13   | -35°C   | -35°C |          | 10 h   | 100% Lowicryl | exch/fill | off       | off |
| 14   | -35°C   | -35°C |          | 48 h   | 100% Lowicryl | stay      | off       | on  |
| 15   | -35°C   | 20°C  | 5        | 9 h    | 100% Lowicryl | stay      | off       | on  |
| 16   | 20°C    | 20°C  |          | 48 h   | 100% Lowicryl | stay      | off       | on  |
| 17   | 20°C    | 20°C  |          | 72 h   | 100% Lowicryl | stay      | off       | off |

**Supplementary Table 1.**

Automated freeze substitution program. UA: uranyl acetate.

| Parameters                         | Round 1    | Round 2    | Round 3    | Round 4 | Round 5 | Round 6 |
|------------------------------------|------------|------------|------------|---------|---------|---------|
| Iterations                         | 1          | 1          | 1          | 1       | 1       | 1       |
| References                         | 1          | 1          | 1          | 1       | 1       | 1       |
| Cone aperture [°]                  | 360        | 180        | 90         | 45      | 24      | 12      |
| Cone Sampling [°]                  | 120        | 60         | 30         | 15      | 8       | 4       |
| Azimuth rotation range [°]         | 360        | 180        | 90         | 45      | 24      | 12      |
| Azimuth rotation sampling [°]      | 120        | 60         | 30         | 15      | 8       | 4       |
| Refine                             | 5          | 5          | 5          | 5       | 5       | 5       |
| Refine factor                      | 2          | 2          | 2          | 2       | 2       | 2       |
| High pass filter [pixel]           | 2          | 2          | 2          | 2       | 2       | 2       |
| Low pass filter [pixel]            | 32         | 32         | 64         | 64      | 80      | 128     |
| Symmetry                           | C1/C6      | C1 / C6    | C1 / C6    | C1 / C6 | C1 / C6 | C1 / C6 |
| Particle dimensions                | 128        | 128        | 128        | 128     | 128     | 256     |
| Shift limits in X, Y and Z [pixel] | 30, 30, 30 | 20, 20, 20 | 12, 12, 12 | 8, 8, 8 | 4, 4, 4 | 2, 2, 2 |
| Shift limiting way                 | 2          | 2          | 2          | 2       | 2       | 2       |
| Separation in tomogram             | 1          | 1          | 1          | 1       | 1       | 1       |

### Supplementary Table 2.

Numerical parameters for subtomogram averaging calculation in Dynamo.

| Construct        | Number of lamellae | Number of tomograms | Number of particles | Resolution (0.143 Criterion) | Resolution (0.5 Criterion) |
|------------------|--------------------|---------------------|---------------------|------------------------------|----------------------------|
| Nsp3-4           | 5                  | 8                   | 325                 | 20.3 Å                       | 29.6 Å                     |
| Nsp3-4 ΔUB1-MAC1 | 4                  | 7                   | 1099                | 18.1 Å                       | 27.0 Å                     |
| Nsp3-4 ΔUB1-UBI2 | 3                  | 8                   | 94                  | 30.3 Å                       | 43.4 Å                     |

### Supplementary Table 3.

Number of particles used for subtomogram averaging and attained resolution.
